# Supplementary material
Source: PubMed Central journal article supplement (PMC7155934)
Supplement: NIHMS1568648-supplement-1.pdf [file NIHMS1568648-supplement-1.pdf]

Figure S1

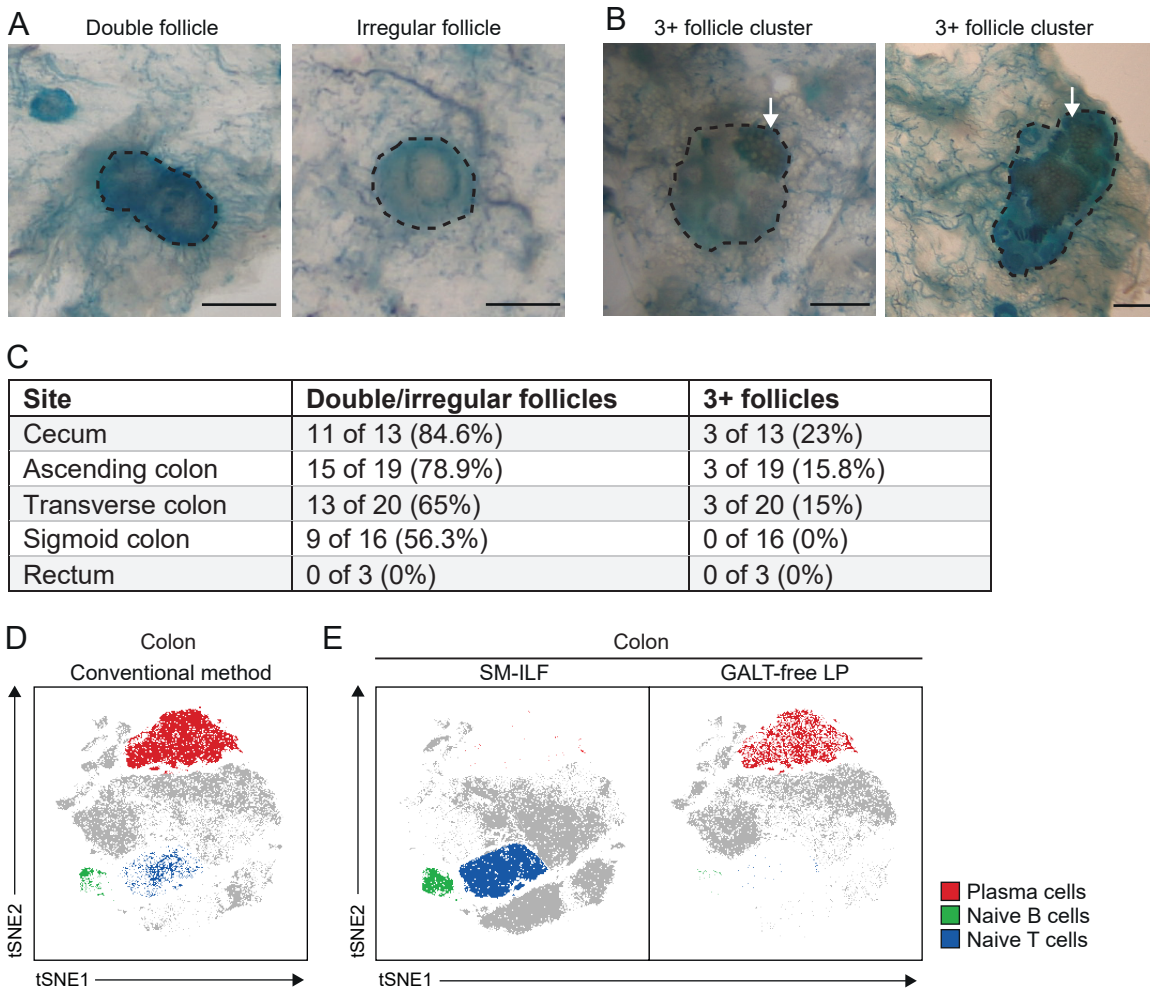

**Figure S1. Related to Figure 1.**

(A and B) GALT in the submucosa were occasionally found to consist of (A) two follicles or have irregular shapes or (B) clusters of three or more follicles. Scale bars represent 1 mm. (C) Proportion of intestinal site that contained irregular or multi-follicular SM-GALT. (D) Representative tSNE plot derived from flow cytometric analysis of CD45<sup>+</sup> cells isolated from digested colon mucosa with attached submucosa using conventional protocols. Surface markers used for tSNE: CD45, CD3, CD8, CD20, CD38, CD138, CD45RA, TCR $\alpha\beta$ , IgD, TCR $\alpha\beta$ , CD117, CCR6, IgA. (E) Representative tSNE plots derived from flow cytometric analysis of CD45<sup>+</sup> cells isolated from colon SM-ILF and GALT-free colon LP. GALT, gut-associated lymphoid tissue; SM-ILF, submucosal follicle; LP, lamina propria.

Figure S2

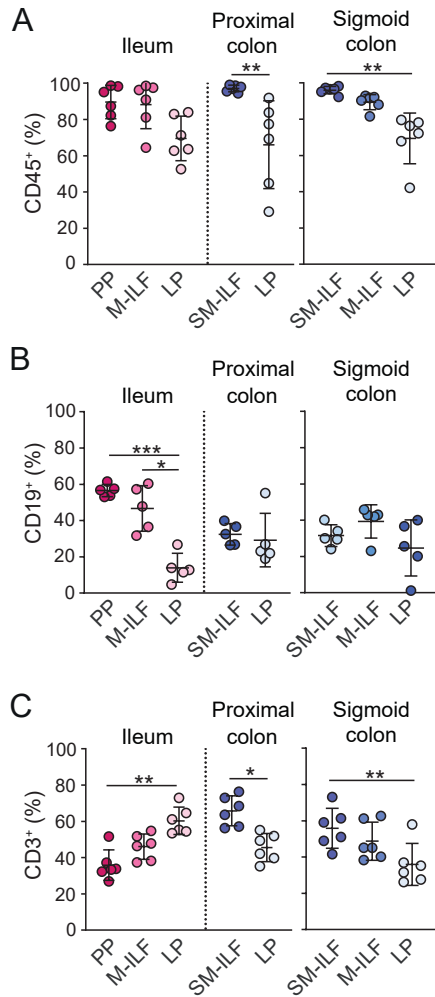

**Figure S2. Related to Figure 2.**

(A-C) Flow cytometric analysis of indicated immune niches. (A) Proportion of viable cells expressing CD45, and proportion of CD45<sup>+</sup> cells expressing (B) CD19 and (C) CD3. Each circle represents an individual donor with paired samples from 4 patients. SM-ILF and M-ILF data are from at least 5 pooled follicles. Bars represent mean  $\pm$  1SD and statistical significance between paired samples was determined using the paired Friedman test with Dunn's multiple comparisons, \*p<0.05, \*\*p<0.01, \*\*\*p<0.001. PP, Peyer's patch; SM-ILF, submucosal follicle; M-ILF, mucosal follicle; LP, lamina propria.

Figure S3

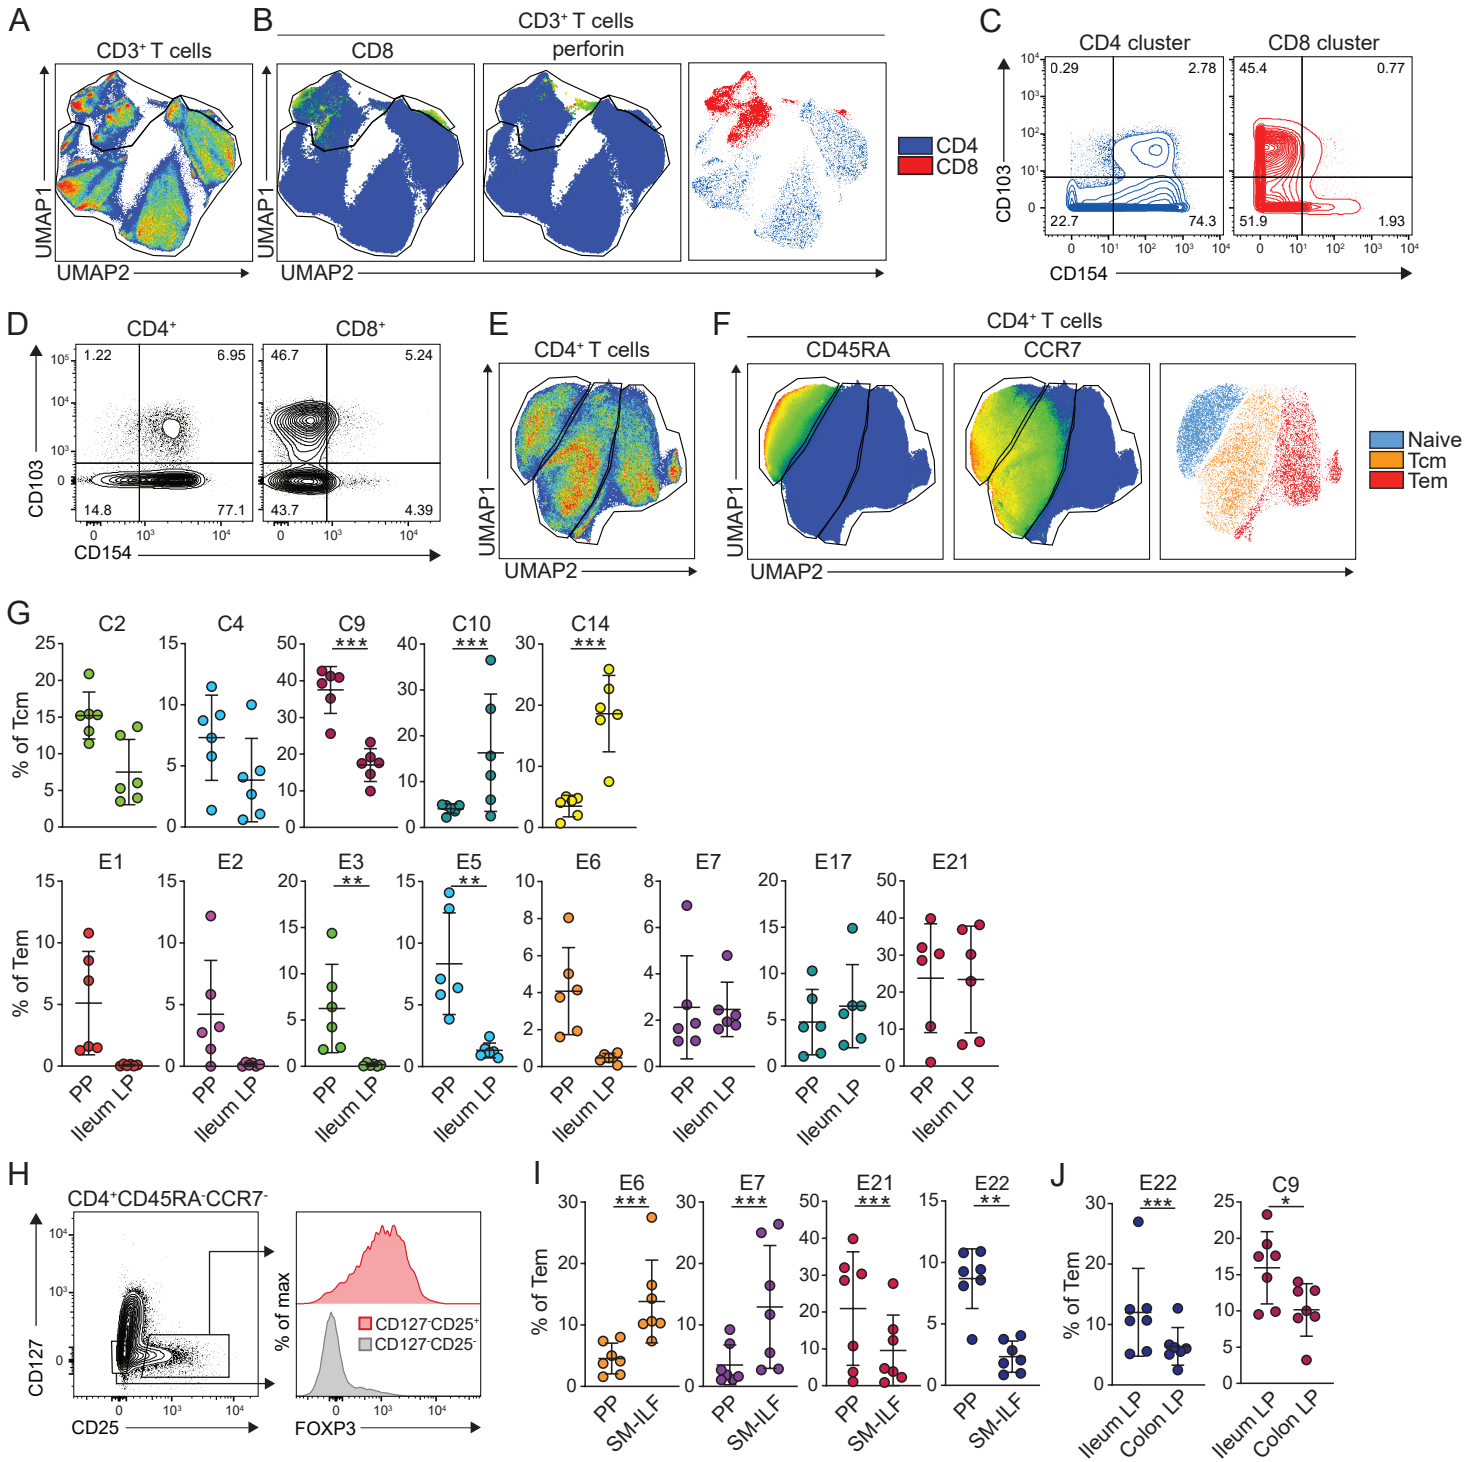

**Figure S3. Related to Figure 3.**

(A-H) Single-cell suspensions of PP, proximal colon SM-ILF and ileum and colon LP were stimulated with PMA and ionomycin and the T cell populations were analyzed by CyTOF. (A) Pseudocolour density plot of total T cell UMAP used to distinguish CD4<sup>+</sup> from CD8<sup>+</sup> T cells. (B) CD8 and perforin expression, and putative CD4 (blue) and CD8 (red) gates overlaid on the total T cell UMAP. (C) CD103 and CD154 expression overlaid on the CD4<sup>+</sup> (blue) and CD8<sup>+</sup> (red) T cell clusters defined in (B). (D) CD103 and CD154 expression by CD4<sup>+</sup> and CD8<sup>+</sup> T cells in colon LP as assessed by flow cytometry. (E) Pseudocolour density plot of CD4<sup>+</sup> T cell UMAP (see STAR methods for details) including manual gates demarcating CD4<sup>+</sup> naïve, Tcm, and Tem. (F) CD45RA and CCR7 expression overlaid on CD4<sup>+</sup> T cell UMAP plot. (G) Frequency of memory CD4<sup>+</sup> T cell clusters in PP and ileum LP. Each circle represents a paired sample from 6 individual patients. Bars represent mean  $\pm$  1SD. (H) FOXP3 expression by CD25<sup>+</sup>CD127<sup>-</sup>CD4<sup>+</sup> Tem in SM-ILF. Results are from 1 representative patient of 3, with at least 10 pooled SM-ILF per patient. (I and J) Frequency of memory CD4<sup>+</sup> T cell clusters in (I) Peyer's patch and SM-ILF and (J) ileum LP and colon LP. Each circle represents a paired sample from 7 individual patients. Bars represent mean  $\pm$  1SD. PP, Peyer's patch; SM-ILF, submucosal isolated lymphoid follicle; LP, lamina propria. Statistical significance was determined using paired 2-way ANOVA, false discovery rate was corrected with the two-stage step-up method of Benjamini, Krieger and Yekutieli, \*p<0.05, \*\*p<0.01, \*\*\*p<0.001. See also Figure S3.

Figure S4

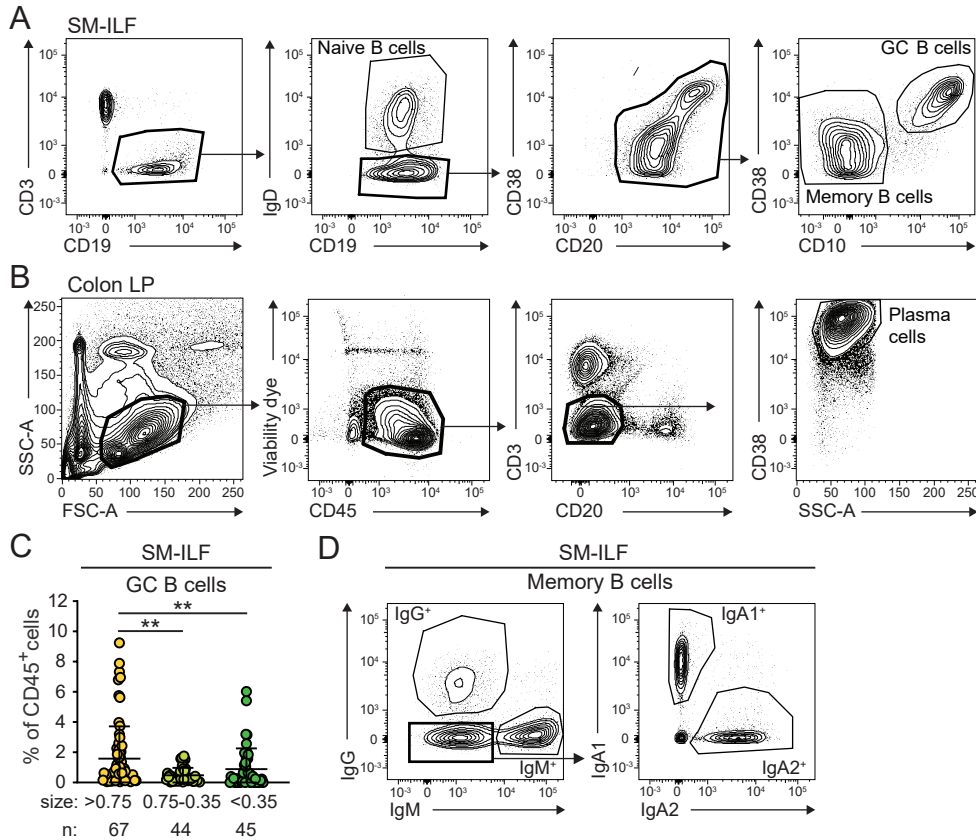

**Figure S4. Related to Figure 4.**

(A-B) Gating strategy to identify naïve, memory and GC B cells and CD45<sup>+</sup> PC by flow cytometry in (A) colon SM-ILF and (B) colon LP. (C) Proportion of CD10<sup>+</sup>CD20<sup>hi</sup> GC B cells amongst total CD45<sup>+</sup> cells in colon SM-ILF of the indicated size. Each circle represents a single SM-ILF. Samples are from 6 proximal colon and 5 distal colon resections. Bars represent mean  $\pm$  1SD. (D) Gating strategy to identify IgM<sup>+</sup>, IgG<sup>+</sup>, IgA1<sup>+</sup> and IgA2<sup>+</sup> memory and GC B cells by flow cytometry. Statistical significance between samples was determined using the Kruskal-Wallis test with Dunn's multiple comparisons, \*\* $p < 0.01$ . GC, germinal center; SM-ILF, submucosal follicle; LP, lamina propria.

Figure S5

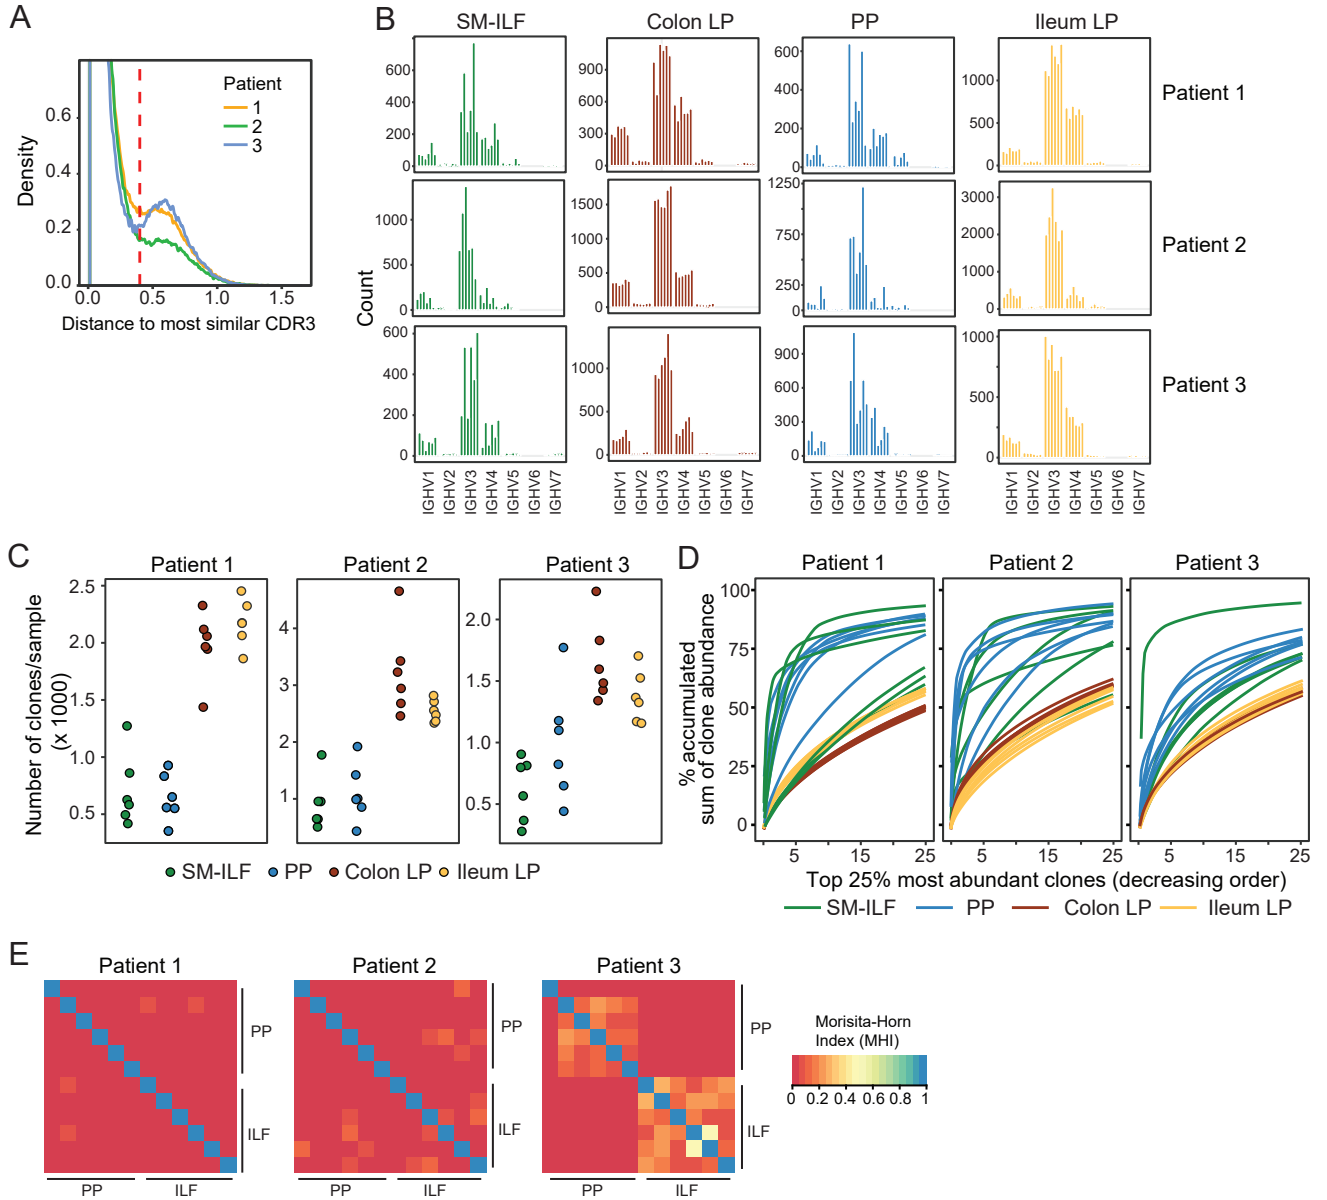

**Figure S5. Related to Figure 5.**

(A) Distribution of the sequence difference, as given by the SF5 substitution matrix, of each CDR3 to the most similar other CDR3 in the IgA repertoire that have the same V and J-gene combination. (B) Distribution of V gene usage in indicated tissues and patients. (C and D) The IgA repertoire in isolated ileum and proximal colon GALT and LP was determined in 3 individual donors. (C) Total number of clones with  $\geq 10$  reads in the indicated tissue in each donor and (D) the cumulative abundance of the 25% most abundant clones within each sample. (E) Morisita-Horn similarity index (MHI) between PP and ILF (SM-ILF) samples taking into account only the top 100 clones in each compartment. PP, Peyer's patch; SM-ILF, submucosal follicle; LP, lamina propria.

Table S1

|                      | Total           | GALT count      | B cells         | T cells        | CytoTOF        | IgA            | FOXP3      | B cell Migration | IHC        |
|----------------------|-----------------|-----------------|-----------------|----------------|----------------|----------------|------------|------------------|------------|
| Number of patients   | 99              | 68              | 24              | 12             | 11             | 3              | 3          | 4                | 25         |
| Age                  | 70.7 ± 9.6      | 70.7 ± 9.4      | 72.8 ± 7.3      | 67.5 ± 11.7    | 69.8 ± 13.1    | 73 ± 13.2      | 70.7 ± 2.1 | 64.8 ± 5.7       | 77.7 ± 4.7 |
| Sex                  |                 |                 |                 |                |                |                |            |                  |            |
| Female               | 51              | 37              | 9               | 6              | 4              | 2              | 1          | 1                | 20         |
| Male                 | 48              | 31              | 15              | 6              | 7              | 1              | 2          | 3                | 5          |
| Site                 |                 |                 |                 |                |                |                |            |                  |            |
| Terminal ileum       | 54              | 14              | 18 <sup>c</sup> | 6 <sup>c</sup> | 8 <sup>c</sup> | 3 <sup>c</sup> | -          | 4 <sup>c</sup>   | 15         |
| Proximal colon       | 73 <sup>a</sup> | 49 <sup>a</sup> | 18 <sup>c</sup> | 6 <sup>c</sup> | 8 <sup>c</sup> | 3 <sup>c</sup> | 1          | 4 <sup>c</sup>   | 14         |
| Sigmoid colon/rectum | 26 <sup>b</sup> | 20 <sup>b</sup> | 6               | 6              | 3              | -              | 2          | -                | 4          |
| Proximal colon site  |                 |                 |                 |                |                |                |            |                  |            |
| Cecum                | 16              | 13              | 5               | 4              | 2              | 1              | -          | -                | 4          |
| Ascending            | 25              | 19              | 7               | 1              | 2              | -              | -          | 2                | 6          |
| Transverse           | 36              | 20              | 6               | 1              | 2              | 2              | 1          | 2                | 4          |
| Combined proximal    | 2               | -               | -               | -              | 2              | -              | -          | -                | -          |
| Diagnosis            |                 |                 |                 |                |                |                |            |                  |            |
| Volvulus             | 4               | 2               | 1               | 1              | 2              | -              | -          | -                | -          |
| Diverticulitis       | 3               | 2               | 1               | 2              | -              | -              | -          | -                | -          |
| Stenosis             | 2               | 1               | -               | -              | -              | -              | 1          | -                | -          |
| Adenocarcinoma       | 90              | 63              | 22              | 9              | 9              | 3              | 2          | 4                | 25         |
| UICC stage           |                 |                 |                 |                |                |                |            |                  |            |
| 0                    | 15              | 11              | 4               | -              | 1              | 1              | -          | -                | 5          |
| 1                    | 14              | 12              | 3               | 1              | 1              | -              | -          | 1                | 2          |
| 2                    | 33              | 20              | 7               | 5              | 6              | 2              | -          | 1                | 9          |
| 3                    | 22              | 16              | 8               | 1              | -              | -              | 1          | 2                | 7          |
| 4                    | 6               | 4               | -               | 2              | 1              | -              | 1          | -                | 2          |

<sup>a</sup> Samples taken from multiple proximal sites per patient

<sup>b</sup> One patient had samples taken from both sigmoid colon and rectum

<sup>c</sup> Samples taken from both ileum and colon per patient allowing paired data analysis

Table S1. Related to experimental model and subject details section of STAR methods

Table S2

| Gene name                             | Primers name | Forward                | Reverse                |
|---------------------------------------|--------------|------------------------|------------------------|
| Actin $\gamma$ 1                      | ACTG1        | CCGAGCCGTGTTTCCTCC     | GCCATGCTCAATGGGGTACT   |
| Ribosomal protein S27                 | RPS27        | ATGCCTCTCGCAAAGGATCTC  | TGAAGTAGGAATTGGGGCTCT  |
| Activation Induced Cytidine Deaminase | AICDA.1      | GAGGCGTGACAGTGCTACATC  | CAGGGTCTAGGTCCCAGTCC   |
| Activation Induced Cytidine Deaminase | AICDA.2      | AAGGGCTGCATGAAAATTCAGT | AAGGGCTGCATGAAAATTCAGT |
| Syndecan-1 (CD138)                    | SDC1.1       | CTGCCGCAAATTGTGGCTAC   | TGAGCCGGAGAAGTTGTCAGA  |
| Syndecan-1 (CD138)                    | SDC1.2       | TTGTGGCTACTAATTTGCC    | TATCTTGCAAAGCACCTGC    |

Table S2. Related to Figure 4.
